# Supplementary material
Source: PubMed Central journal article supplement (PMC2885218)

**Supplemental Data for:-**

**EVIDENCE THAT THE YEAST DESATURASE Ole1p EXISTS AS A  
DIMER IN VIVO**

**Ying Lou and John Shanklin**

**Figure S1. Additional negative control experiment for the membrane split-ubiquitin yeast two-hybrid analysis shows that Ole1p self-association is specific because Ole1p does not associate with a co-expressed plant desaturase Fad3.** Panel A, schematic representation of the pairs of bait and prey plasmid constructs. Designations are the same as in Fig. 3, Fad3 refers to the Arabidopsis linoleate desaturase. Panel B, challenge of yeast harboring the constructs illustrated in Panel A on selective minimal SD–T-L-H-A media.

Supplemental Figure 1.

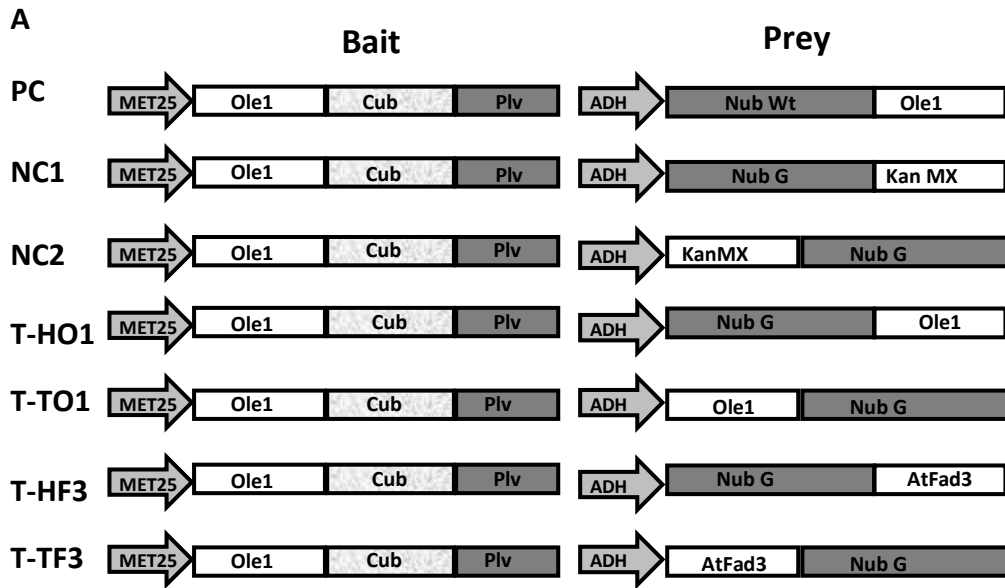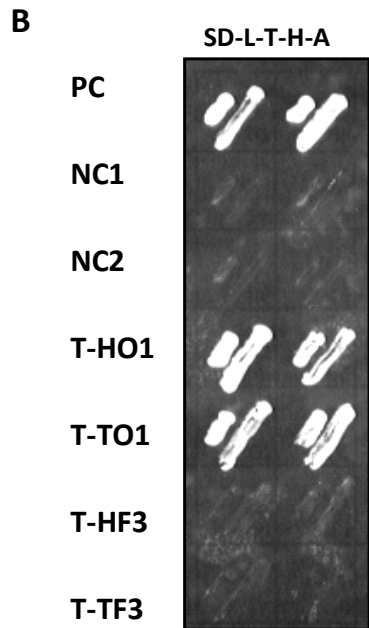

Supplement: supp_M110.125377_jbc.M110.125377-1.pdf [file supp_M110.125377_jbc.M110.125377-1.pdf]
